# Supplementary material for: Preparation and characterization of highly crystalline hydroxyapatite (HAp) from the scales of an anadromous fish (Tenualosa ilisha): a comparative study with the freshwater fish scale (Labeo rohita) derived HAp
Source: Royal Society of Chemistry journal article supplement (doi:10.1039/d4ra06662f), 2024-01-01
Supplement: d4ra06662f1.pdf [file d4ra06662f1.pdf]

**Preparation and characterization of highly crystalline hydroxyapatite (HAp) from the scales of an anadromous fish (*Tenualosa ilisha*): A comparative study with the freshwater fish scale (*Labeo rohita*) derived HAp**

Mashrafi Bin Mobarak<sup>a\*</sup>, Fariha Chowdhury<sup>b</sup> and Samina Ahmed<sup>a\*</sup>

<sup>a</sup>Institute of Glass and Ceramic Research and Testing (IGCRT), Bangladesh Council of Scientific and Industrial Research (BCSIR), Dhaka-1205, Bangladesh

<sup>b</sup>Biomedical and toxicological Research Institute (BTRI), Bangladesh Council of Scientific and Industrial Research (BCSIR), Dhaka-1205, Bangladesh

\*mashrafinmobarak@gmail.com; shanta\_samina@yahoo.com

Table S1 Crystallographic parameters of I-HAp based on XRD data

| 2 $\theta$<br>Degree | $\theta$<br>Degree | FWH<br>M ( $\beta$ )<br>Degree | FWHM<br>( $\beta$ )<br>Radians | d<br>spacin<br>g<br>Å | Cos $\theta$<br>Degree | 1/Cos $\theta$<br>Degree | Ln(1/Cos $\theta$ )<br>Degree | Ln $\beta$<br>Radians | 4Sin $\theta$<br>Degree | $\beta$ (radian).<br>Cos $\theta$<br>Degree |
|----------------------|--------------------|--------------------------------|--------------------------------|-----------------------|------------------------|--------------------------|-------------------------------|-----------------------|-------------------------|---------------------------------------------|
| 10.94                | 5.47               | 0.048                          | 0.0008                         | 8.08                  | 0.9954                 | 1.0046                   | 0.0046                        | -7.0847               | 0.3815                  | 0.0008                                      |
| 16.94                | 8.47               | 0.091                          | 0.0016                         | 5.23                  | 0.9891                 | 1.0110                   | 0.0109                        | -6.4451               | 0.5891                  | 0.0016                                      |
| 21.89                | 10.94              | 0.085                          | 0.0015                         | 4.06                  | 0.9818                 | 1.0185                   | 0.0183                        | -6.5133               | 0.7593                  | 0.0015                                      |
| 22.97                | 11.48              | 0.072                          | 0.0013                         | 3.87                  | 0.9799                 | 1.0204                   | 0.0202                        | -6.6793               | 0.7963                  | 0.0012                                      |
| 25.98                | 12.99              | 0.065                          | 0.0011                         | 3.43                  | 0.9744                 | 1.0263                   | 0.0259                        | -6.7847               | 0.8991                  | 0.0011                                      |
| 28.23                | 14.11              | 0.062                          | 0.0011                         | 3.16                  | 0.9698                 | 1.0311                   | 0.0307                        | -6.8288               | 0.9754                  | 0.0010                                      |
| 29.05                | 14.53              | 0.06                           | 0.0010                         | 3.07                  | 0.9680                 | 1.0330                   | 0.0325                        | -6.8616               | 1.0032                  | 0.0010                                      |
| 31.89                | 15.94              | 0.066                          | 0.0011                         | 2.80                  | 0.9615                 | 1.0400                   | 0.0392                        | -6.7724               | 1.0988                  | 0.0011                                      |
| 32.29                | 16.15              | 0.06                           | 0.0010                         | 2.77                  | 0.9606                 | 1.0411                   | 0.0402                        | -6.8616               | 1.1124                  | 0.0010                                      |
| 33.02                | 16.51              | 0.069                          | 0.0012                         | 2.71                  | 0.9588                 | 1.0430                   | 0.0421                        | -6.7219               | 1.1368                  | 0.0012                                      |
| 34.16                | 17.08              | 0.068                          | 0.0012                         | 2.62                  | 0.9559                 | 1.0462                   | 0.0451                        | -6.7365               | 1.1749                  | 0.0011                                      |
| 35.56                | 17.78              | 0.106                          | 0.0019                         | 2.52                  | 0.9522                 | 1.0502                   | 0.0489                        | -6.2925               | 1.2216                  | 0.0018                                      |
| 39.30                | 19.65              | 0.058                          | 0.0010                         | 2.29                  | 0.9418                 | 1.0618                   | 0.0600                        | -6.8955               | 1.3452                  | 0.0009                                      |
| 39.91                | 19.95              | 0.065                          | 0.0011                         | 2.26                  | 0.9399                 | 1.0639                   | 0.0619                        | -6.7816               | 1.3650                  | 0.0011                                      |
| 43.98                | 21.99              | 0.073                          | 0.0013                         | 2.06                  | 0.9273                 | 1.0784                   | 0.0755                        | -6.6655               | 1.4977                  | 0.0012                                      |
| 48.19                | 24.09              | 0.078                          | 0.0014                         | 1.89                  | 0.9129                 | 1.0954                   | 0.0912                        | -6.5993               | 1.6330                  | 0.0012                                      |
| 49.58                | 24.79              | 0.069                          | 0.0012                         | 1.84                  | 0.9079                 | 1.1015                   | 0.0967                        | -6.7219               | 1.6770                  | 0.0011                                      |
| 50.59                | 25.29              | 0.067                          | 0.0012                         | 1.80                  | 0.9041                 | 1.1061                   | 0.1008                        | -6.7513               | 1.7092                  | 0.0011                                      |
| 51.38                | 25.69              | 0.086                          | 0.0015                         | 1.78                  | 0.9011                 | 1.1097                   | 0.1041                        | -6.5016               | 1.7341                  | 0.0014                                      |
| 52.19                | 26.09              | 0.079                          | 0.0014                         | 1.75                  | 0.8989                 | 1.1135                   | 0.1075                        | -6.5865               | 1.7593                  | 0.0012                                      |
| 53.28                | 26.64              | 0.076                          | 0.0013                         | 1.78                  | 0.8938                 | 1.1188                   | 0.1122                        | -6.6266               | 1.7936                  | 0.0012                                      |
| 55.98                | 27.99              | 0.083                          | 0.0014                         | 1.64                  | 0.8830                 | 1.1324                   | 0.1244                        | -6.5371               | 1.8771                  | 0.0013                                      |

Table S2 Crystallographic parameters of R-HAp based on XRD data

| 2 $\theta$<br>Degree | $\theta$<br>Degree | FWH<br>M ( $\beta$ )<br>Degree | FWHM<br>( $\beta$ )<br>Radians | d<br>spacin<br>g<br>Å | Cos $\theta$<br>Degree | 1/Cos $\theta$<br>Degree | Ln(1/Cos $\theta$ )<br>Degree | Ln $\beta$<br>Radians | 4Sin $\theta$<br>Degree | $\beta$ (radian).<br>Cos $\theta$<br>Degree |
|----------------------|--------------------|--------------------------------|--------------------------------|-----------------------|------------------------|--------------------------|-------------------------------|-----------------------|-------------------------|---------------------------------------------|
| 10.87                | 5.44               | 0.089                          | 0.0016                         | 8.13                  | 0.9955                 | 1.0045                   | 0.0045                        | -6.4673               | 0.3789                  | 0.0015                                      |
| 21.82                | 10.91              | 0.105                          | 0.0018                         | 4.07                  | 0.9819                 | 1.0184                   | 0.0182                        | -6.3020               | 0.7569                  | 0.0018                                      |
| 22.88                | 11.44              | 0.067                          | 0.0012                         | 3.88                  | 0.9801                 | 1.0203                   | 0.0201                        | -6.7513               | 0.7933                  | 0.0011                                      |
| 25.88                | 12.94              | 0.065                          | 0.0011                         | 3.44                  | 0.9746                 | 1.0261                   | 0.0257                        | -6.7816               | 0.8958                  | 0.0011                                      |
| 28.11                | 14.05              | 0.086                          | 0.0015                         | 3.172                 | 0.9701                 | 1.0309                   | 0.0304                        | -6.5016               | 0.9714                  | 0.0015                                      |
| 28.97                | 14.48              | 0.067                          | 0.0012                         | 3.08                  | 0.9682                 | 1.0328                   | 0.0323                        | -6.7513               | 1.0004                  | 0.0011                                      |
| 31.80                | 15.90              | 0.064                          | 0.0011                         | 2.81                  | 0.9617                 | 1.0398                   | 0.0390                        | -6.7971               | 1.0959                  | 0.0011                                      |
| 32.20                | 16.10              | 0.066                          | 0.0012                         | 2.78                  | 0.9608                 | 1.0408                   | 0.0400                        | -6.7663               | 1.1093                  | 0.0011                                      |
| 33.17                | 16.58              | 0.16                           | 0.0028                         | 2.69                  | 0.9584                 | 1.0434                   | 0.0425                        | -5.8808               | 1.1417                  | 0.0027                                      |
| 34.07                | 17.04              | 0.065                          | 0.0011                         | 2.63                  | 0.9561                 | 1.0459                   | 0.0449                        | -6.7816               | 1.1719                  | 0.0011                                      |
| 35.49                | 17.75              | 0.06                           | 0.0010                         | 2.53                  | 0.9524                 | 1.0499                   | 0.0488                        | -6.8616               | 1.2193                  | 0.0009                                      |
| 39.84                | 19.92              | 0.066                          | 0.0012                         | 2.26                  | 0.9402                 | 1.0637                   | 0.0617                        | -6.7663               | 1.3629                  | 0.0011                                      |
| 43.86                | 21.93              | 0.055                          | 0.0009                         | 2.06                  | 0.9277                 | 1.0779                   | 0.0751                        | -6.9486               | 1.4938                  | 0.0009                                      |
| 48.11                | 24.05              | 0.062                          | 0.0011                         | 1.89                  | 0.9132                 | 1.0951                   | 0.0908                        | -6.8288               | 1.6303                  | 0.0009                                      |
| 49.48                | 24.74              | 0.078                          | 0.0014                         | 1.84                  | 0.9082                 | 1.1011                   | 0.0963                        | -6.5993               | 1.6741                  | 0.0012                                      |
| 50.52                | 25.26              | 0.087                          | 0.0015                         | 1.81                  | 0.9044                 | 1.1057                   | 0.1005                        | -6.4901               | 1.7069                  | 0.0014                                      |
| 51.31                | 25.66              | 0.066                          | 0.0012                         | 1.78                  | 0.9014                 | 1.1094                   | 0.1038                        | -6.7663               | 1.7318                  | 0.0010                                      |

|        |       |       |        |      |        |        |        |         |        |        |
|--------|-------|-------|--------|------|--------|--------|--------|---------|--------|--------|
| 52.097 | 26.05 | 0.076 | 0.0013 | 1.75 | 0.8984 | 1.1131 | 0.1071 | -6.6252 | 1.7565 | 0.0012 |
| 53.18  | 26.59 | 0.102 | 0.0018 | 1.72 | 0.8942 | 1.1183 | 0.1118 | -6.3310 | 1.7904 | 0.0016 |
| 55.90  | 27.95 | 0.071 | 0.0012 | 1.64 | 0.8833 | 1.1321 | 0.1240 | -6.6933 | 1.8749 | 0.0011 |

Table S3 CS of I-HAp calculation using SEAM

| FWHM ( $\beta$ )<br>Radians | Cos $\theta$<br>Degree | Crystallite Size<br>$D = \frac{k\lambda}{\beta \cos \theta}$<br>mm | Average Crystallite<br>Size |
|-----------------------------|------------------------|--------------------------------------------------------------------|-----------------------------|
| 0.0008                      | 0.9954                 | 166.26                                                             | 120.19                      |
| 0.0016                      | 0.9891                 | 88.26                                                              |                             |
| 0.0015                      | 0.9818                 | 95.19                                                              |                             |
| 0.0013                      | 0.9799                 | 112.59                                                             |                             |
| 0.0011                      | 0.9744                 | 125.82                                                             |                             |
| 0.0011                      | 0.9698                 | 132.12                                                             |                             |
| 0.0010                      | 0.9680                 | 136.78                                                             |                             |
| 0.0011                      | 0.9615                 | 125.95                                                             |                             |
| 0.0010                      | 0.9606                 | 137.84                                                             |                             |
| 0.0012                      | 0.9588                 | 120.09                                                             |                             |
| 0.0012                      | 0.9559                 | 122.22                                                             |                             |
| 0.0019                      | 0.9522                 | 78.71                                                              |                             |
| 0.0010                      | 0.9418                 | 145.44                                                             |                             |
| 0.0011                      | 0.9399                 | 130.03                                                             |                             |
| 0.0013                      | 0.9273                 | 117.36                                                             |                             |
| 0.0014                      | 0.9129                 | 111.57                                                             |                             |
| 0.0012                      | 0.9079                 | 126.82                                                             |                             |
| 0.0012                      | 0.9041                 | 131.15                                                             |                             |
| 0.0015                      | 0.9011                 | 102.51                                                             |                             |
| 0.0014                      | 0.8989                 | 111.97                                                             |                             |
| 0.0013                      | 0.8938                 | 117.10                                                             |                             |
| 0.0014                      | 0.8830                 | 108.39                                                             |                             |

Table S4 CS of R-HAp calculation using SEAM

| FWHM ( $\beta$ )<br>Radians | Cos $\theta$<br>Degree | Crystallite Size<br>$D = \frac{k\lambda}{\beta \cos \theta}$<br>nm | Average Crystallite<br>Size |
|-----------------------------|------------------------|--------------------------------------------------------------------|-----------------------------|
| 0.0016                      | 0.9955                 | 89.66                                                              | 115.23                      |
| 0.0018                      | 0.9819                 | 77.05                                                              |                             |
| 0.0012                      | 0.9801                 | 120.97                                                             |                             |
| 0.0011                      | 0.9746                 | 125.40                                                             |                             |
| 0.0015                      | 0.9701                 | 95.23                                                              |                             |
| 0.0012                      | 0.9682                 | 122.46                                                             |                             |
| 0.0011                      | 0.9617                 | 129.07                                                             |                             |
| 0.0012                      | 0.9608                 | 125.28                                                             |                             |
| 0.0028                      | 0.9584                 | 51.81                                                              |                             |
| 0.0011                      | 0.9561                 | 127.83                                                             |                             |
| 0.0010                      | 0.9524                 | 139.02                                                             |                             |
| 0.0012                      | 0.9402                 | 128.03                                                             |                             |
| 0.0009                      | 0.9277                 | 155.71                                                             |                             |
| 0.0011                      | 0.9132                 | 140.32                                                             |                             |
| 0.0014                      | 0.9082                 | 112.14                                                             |                             |
| 0.0015                      | 0.9044                 | 100.97                                                             |                             |
| 0.0012                      | 0.9014                 | 133.53                                                             |                             |
| 0.0013                      | 0.8984                 | 116.35                                                             |                             |
| 0.0018                      | 0.8942                 | 87.09                                                              |                             |
| 0.0012                      | 0.8833                 | 126.67                                                             |                             |
